# Supplementary material for: Sell Winners and Buy Losers? The Impact of Familiarity on Individual Investors’ Decision-Making: Experimental Results
Source: MDPI journal article supplement (doi:10.3390/ijfs9030047), 2021-09-02
Supplement: s1 [file s1]

## Supplementary material

| Action                         | Assets         | Jan            | Feb | Mar | Apr | May | Jun | Jul | Aug | Sep | Oct | Nov | Dec |
|--------------------------------|----------------|----------------|-----|-----|-----|-----|-----|-----|-----|-----|-----|-----|-----|
| <b>Money:</b>                  |                | <b>28 RUR</b>  |     |     |     |     |     |     |     |     |     |     |     |
| <div>Sell</div> <div>Buy</div> | 0 x <b>ZXY</b> | 10             | 10  | 11▲ | 11  | 11  | 11  | 12▲ | 12  | 12  | 12  | 11▼ | 12▲ |
| <div>Sell</div> <div>Buy</div> | 1 x <b>ZYX</b> | 10             | 9▼  | 9   | 9   | 8▼  | 8   | 7▼  | 6▼  | 5▼  | 5   | 5   | 5   |
| <div>Sell</div> <div>Buy</div> | 2 x <b>ZXX</b> | 10             | 9▼  | 9   | 8▼  | 9▲  | 10▲ | 9▼  | 9   | 10▲ | 10  | 11▲ | 11  |
| <div>Sell</div> <div>Buy</div> | 1 x <b>YXX</b> | 10             | 11▲ | 12▲ | 13▲ | 13  | 14▲ | 15▲ | 15  | 15  | 14▼ | 14  | 13▼ |
| <div>Sell</div> <div>Buy</div> | 2 x <b>XZZ</b> | 10             | 9▼  | 8▼  | 8   | 9▲  | 9   | 8▼  | 9▲  | 10▲ | 10  | 11▲ | 11  |
| <div>Sell</div> <div>Buy</div> | 0 x <b>XZY</b> | 10             | 10  | 9▼  | 8▼  | 7▼  | 6▼  | 5▼  | 6▲  | 5▼  | 5   | 4▼  | 5▲  |
| <div>Sell</div> <div>Buy</div> | 1 x <b>YXZ</b> | 10             | 11▲ | 10▼ | 11▲ | 12▲ | 11▼ | 12▲ | 12  | 13▲ | 14▲ | 15▲ | 14▼ |
| <div>Sell</div> <div>Buy</div> | 0 x <b>ZYY</b> | 10             | 11▲ | 12▲ | 12  | 11▼ | 11  | 12▲ | 11▼ | 10▼ | 10  | 9▼  | 9   |
| <b>Portfolio value:</b>        |                | <b>104 RUR</b> |     |     |     |     |     |     |     |     |     |     |     |

Supplementary Scheme S1. Example of an unfamiliar portfolio
